# Supplementary material for: Range-wide phylogenomics of the Great Horned Owl (Bubo virginianus) reveals deep north-south divergence in northern Peru
Source: PeerJ journal article supplement (doi:10.7717/peerj.15787), 2023-08-09
Supplement: FigureS2.pdf [file FigureS2.pdf]

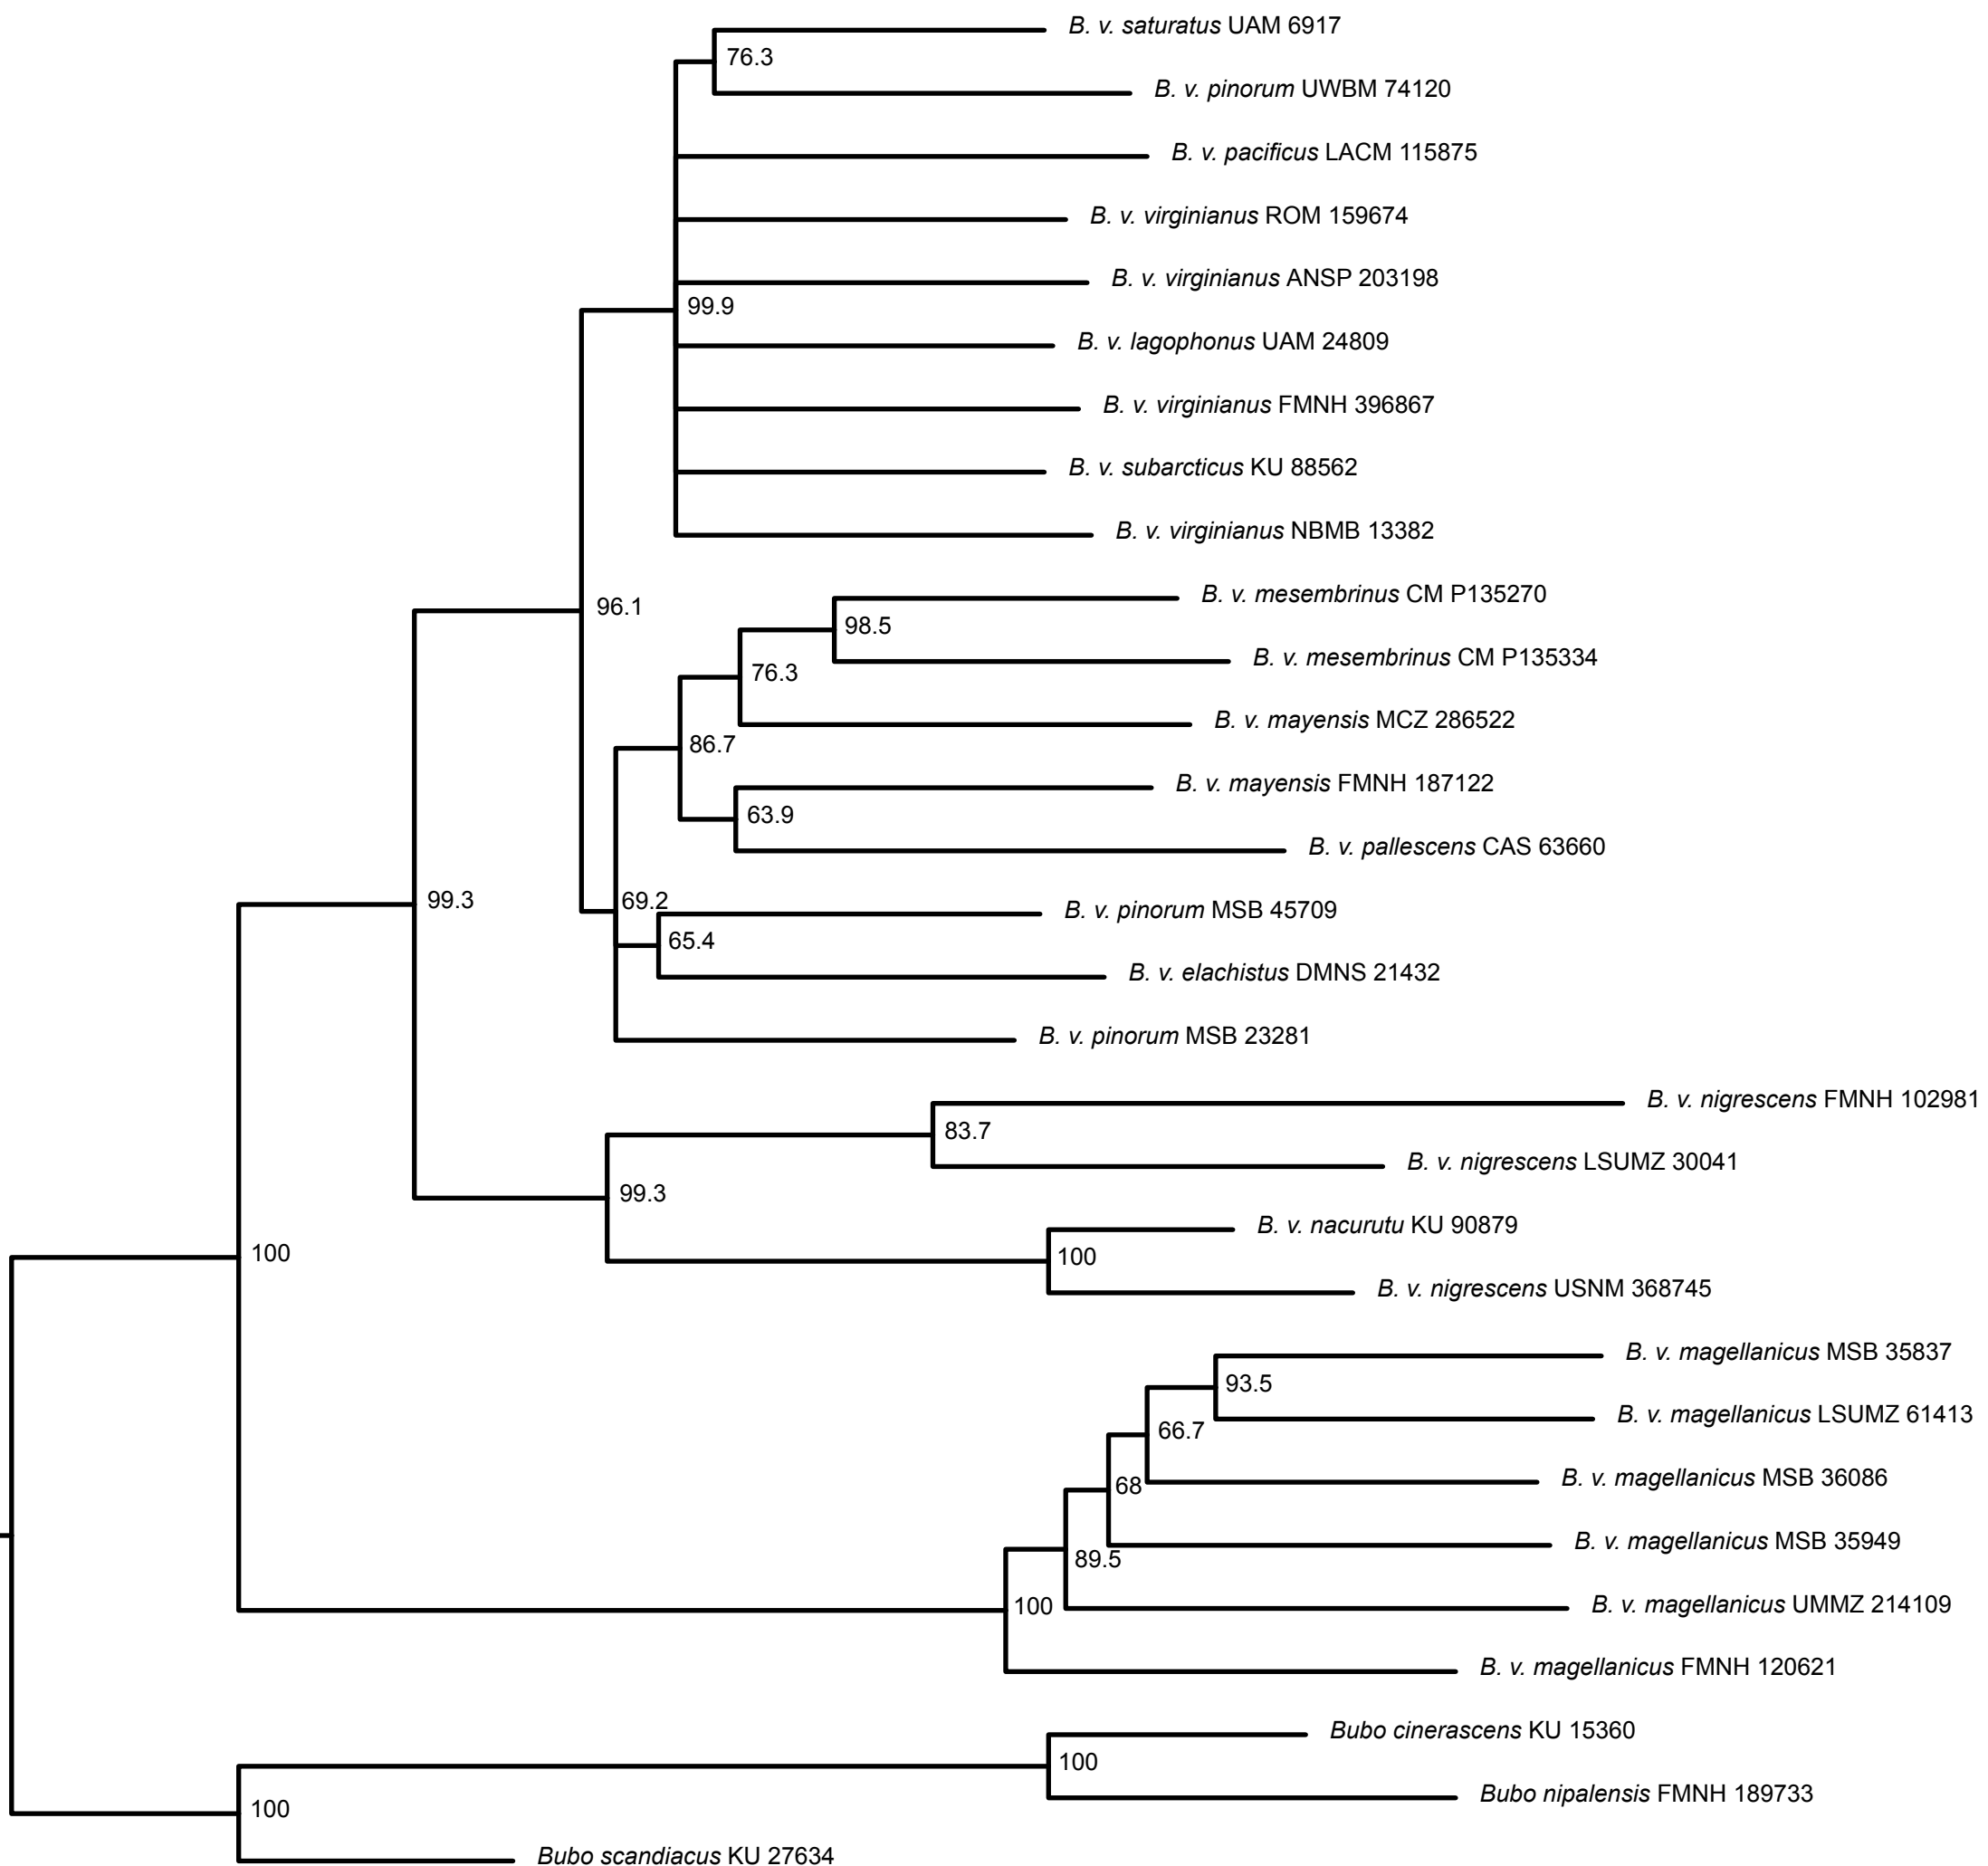

6.0E-5
